# Supplementary material for: Invisible in the Crisis: Community Narratives on Extreme Weather and Oral Health Inequities in Khyber Pakhtunkhwa, Pakistan
Source: Research Square preprint supplement (doi:10.21203/rs.3.rs-7304819/v1), 2025-11-20
Supplement: Supplementary file 1 [file 932dce387cb6ab4b45cbcec2.docx]

**Topic Guide for Focus Group Discussion (FGD)**

1. **Can you tell me a little about yourself, such as your age, occupation, family, and how long you have lived in this area?**
   Prompts: Would you like to share how long your family has been here? What is your daily routine like? Who do you live with?
2. **What types of extreme weather events (such as flooding, heatwaves, or droughts) have you experienced in this area? When did they happen and how often do they occur?**
   Prompts: Can you recall any recent extreme weather events? How frequently do these events occur now compared to the past? What kind of impact did they have on you or your community?
3. **During the extreme weather events, have you or your family faced challenges in accessing healthcare or dental services?**
   Prompts: What kind of challenges did you encounter? Was it difficult to reach a clinic or hospital? Did you or your family need care urgently?
4. **Did you experience any difficulties in accessing dental care during these events?**
   Prompts: Were the dental clinics open or closed? Were there issues with transport or affordability? How far was the nearest available service?
5. **Were there challenges in accessing dental care for children, elderly, or vulnerable members of your family?**
   Prompts: Were they able to receive care in time? Did their condition worsen due to delays? What specific difficulties did they face?
6. **How did you cope with these challenges? Did you try any home remedies or delay seeking dental care?**
   Prompts: What alternatives did you try at home? Did you get advice from neighbours or elders? Were you able to seek professional help later?
7. **How well do you think the healthcare system in your area is prepared for extreme weather events?**
   Prompts: Are there any plans or warnings in place before such events? Do local clinics remain open during emergencies? Is there any communication or support from local authorities?
8. **Did the weather events affect the availability or functioning of dental clinics and healthcare facilities in your area?**
   Prompts: Were clinics damaged or inaccessible? Was there a shortage of staff or equipment? How long did the disruption last?
9. **After the weather events, did you notice any changes in the availability of dental care services or disruptions in regular care?**
   Prompts: Were appointments delayed or cancelled? Did people in your area continue to face difficulties? How long did it take for services to return to normal?
10. **Do you think local authorities are doing enough to ensure people can access dental care during extreme weather events?**
    Prompts: Have you seen any efforts by the government or local officials? Has dental care ever been included in relief efforts? What improvements would you suggest?
11. **Have any specific programmes or measures been introduced to support dental care during extreme weather events?**
    Prompts: Were any health or dental camps organised? Did government teams or NGOs visit your area? Were they helpful?
12. **How could the healthcare system, including dental services, be improved to handle extreme weather events better?**
    Prompts: What kind of services or facilities would have helped you? Should dental care be included in emergency planning? What would be most useful for your community?
13. **How has your community adapted to these extreme weather events in terms of health and dental care?**
    Prompts: Do people prepare in advance for such events? Are there shared resources or support networks? What strategies have helped your community cope?
14. **Does your community have support systems or local initiatives that help people access dental care during such events?**
    Prompts: Are there any informal arrangements or community helpers? Do neighbours or local leaders provide support? Have any groups or local initiatives been set up?
15. **What lessons have you learned from past extreme weather events that could help improve future access to dental care?**
    Prompts: What would you do differently in future? Has your family changed how it prepares? Any advice or recommendations for others?
16. **What would you like to see happen to improve access to dental care during future extreme weather events in your area?**
    Prompts: What services or support would make the biggest difference? Should local clinics or mobile services be improved? Would more education or awareness help?
17. **Is there anything else you would like to share about your experience with extreme weather events and accessing dental care?**
    Prompts: Is there a personal story or experience you'd like to add? Have we missed anything important you'd like to mention?
18. **Thank you very much for time.**
